# Supplementary material for: Mechanisms and Clinical Trials of Hepatocellular Carcinoma Immunotherapy
Source: Front Genet. 2021 Jul 8;12:691391. doi: 10.3389/fgene.2021.691391 (PMC8296838; doi:10.3389/fgene.2021.691391)
Supplement: Supplementary file 1 [file Table_1.xlsx]

## Sheet: Sheet1
Supplementary Table 1. Ongoing clinical trials involving PD-1 in HCC.
Name	Trail ID	Phase	Study population	Intervention	Status
Cabozantinib	NCT04767906	II	Metastatic and/or unresectable, pre-treatment with a PD-1/PD-L1 inhibitor for at least one administration, refractory to PD-1 inhibitors, advanced HCC patients	Cabozantinib	Not yet recruiting
AK104 lenvatinib	NCT04728321	II	Advanced HCC patients	Anti-PD-1/CTLA-4 bispecific AK104 alone or in combination with Lenvatinib	Recruiting
AK104 plus Lenvatinib	NCT04444167	I/II	Advanced HCC patients	Anti-PD-1/CTLA-4 bispecific AK104 plus Lenvatinib	Recruiting
PD-1 knockout engineered T cells	NCT04417764	I	Unresectable, advanced HCC patients	Transcatheter arterial chemoembolization (TACE) combined with PD-1 knockout engineered T cell	Recruiting
Tislelizumab	NCT04652440	I/II	HCC patients with no distant metastasis or lymph node metastasis	PD-1 monoclonal antibody Tislelizumab plus radiofrequency ablation (RFA )	Recruiting
Sintilimab	NCT04297280	II	HCC patients	TACE combined with anti-PD-1 antibody Sintilimab	Recruiting
DEB-TACE plus Lenvatinib or Sorafenib or PD-1 inhibitor	NCT04229355	III	Unresectable HCC patients	TACE based on drug-eluting beads (DEB-TACE) plus Lenvatinib or Sorafenib or PD-1 inhibitor	Recruiting
Radiation therapy, anti-PD-1 antibody	NCT03857815	II	HCC patients, including metastatic inoperable or unresectable.	Stereotactic body radiation therapy combined with anti-PD-1 antibody	Recruiting
Radiation therapy, PD-1 antibody	NCT04193696	II	Advanced HCC patients, including extrahepatic metastasis or intrahepatic multifocal lesions	Radiation therapy and systemic anti-PD-1 immunotherapy	Not yet recruiting
Anti-angiogenic agents plus anti-PD-1 antibody	NCT04639284	Unknown	Unresectable or advanced HCC patients	Anti-angiogenic agents plus anti-PD-1/PD-L1 antibodies	Recruiting
Anti-PD-1 and targeted therapy	NCT04101747	Observational cohort	HCC patients with no systematic treatment	Anti-PD-1 combined with targeted therapy	Not yet recruiting
PD-1 mAb, Lenvatinib and TACE in HCC (PLTHCC)	NCT04273100	II	Late stage HCC patients	PD-1 mAb combined with TACE and Lenvatinib	Recruiting
Apatinib, PD-1 antibody and SHR-1210	NCT03839550	II	HCC patients with high risk of recurrence after radical resection	Apatinib Mesylate + SHR-1210, hepatic arterial infusion (HAI)	Not yet recruiting
Ropeginterferon alfa-2b (P1101) and anti-PD1 Nivolumab	NCT04233840	I/II	Patients after curative surgery of hepatitis B-related HCC	Ropeginterferon alfa-2b (P1101 ) and subsequent treatment of anti-PD1 Nivolumab	Recruiting
PolyIC and PD-1 mAb	NCT03732547	II	unresectable late-stage HCC patients	Polyinosinic-polycytidylic acid (PolyIC) and PD-1 mAb therapy	Recruiting
SHR-1210, Oxaliplatin and 5-fluorouracil (FOLFOX4)	NCT03605706	III	Advanced HCC patients who have never received prior systemic treatment.	SHR-1210 in combination with Oxaliplatin and 5-fluorouracil (FOLFOX4)	Recruiting
Lenvatinib, anti-PD1 antibodies	NCT04627012	Observational cohort	Advanced HCC patients	Lenvatinib, Opdivo, Camrelizumab, Keytruda, Toripalimab, Sintilimab, Tislelizumab	Recruiting
PD-1 inhibitor	NCT03966209	I	Patients with recurrent HCC after liver transplantation	JS001(PD-1 inhibitor)	Recruiting
Donafenib and anti-PD-1 antibody	NCT04418401	I	HCC patients with high risks of recurrence.	Donafinib combined with anti-PD-1 antibody as adjuvant therapy	Recruiting
Camrelizumab in recurrent HCC	NCT04564313	I	Recurrent HCC patients after liver transplantation	Anti-PD-1 antibody Camrelizumab	Recruiting
PD-1 antibody and Lenvatinib Plus TACE plus FOLFOX-based chemotherapy infusion (TACE-HAIC)	NCT04814043	II	Potential resectable HCC Patients	Drug: PD-1 inhibitor	Not yet recruiting
Transarterial infusion of PD-1 antibody plus TACE-HAIC	NCT04814030	II	Unresectable HCC patients	PD-1 inhibitor	Recruiting
Combination of PD-1 and vascular endothelial receptor 2 (VEGFR-2) Blockade	NCT04393220	II	Advanced HCC patients	Bevacizumab, Nivolumab	Recruiting
SHR-1210 combined with Apatinib mesylate in the perioperative treatment	NCT04297202	II	HCC patients	Apatinib combined with SHR-1210 injection	Recruiting
Sintilimab combined with Apatinib and Capecitabine	NCT04411706	II	Advanced HCC patients with no systemic treatment before	Sintilimab, Apatinib and Capecitabine	Recruiting
SHR-1210 Plus Apatinib	NCT04014101	II	Advanced HCC patients	SHR-1210 Apatinib	Recruiting
Toripalimab (a PD-1 Inhibitor) or placebo as adjuvant therapy	NCT03859128	II/III	HCC patients after curative hepatic resection	Toripalimab injection (JS001)	Recruiting
Nivolumab, Tadalafil and Oral Vancomycin	NCT03785210	II	People with refractory primary hepatocellular carcinoma or liver dominant metastatic cancer from colorectal or pancreatic cancers	Drug: nivolumab Drug: tadalafil Drug: oral vancomycin	Recruiting
HLX10 (anti-PD-1 antibody) in combination with HLX04 (anti-VEGF antibody) versus Sorafenib as the first-line treatment	NCT04465734	III	Patients with locally advanced or metastatic HCC	Drug: HLX10 Drug: HLX04 Drug: Sorafenib	Not yet recruiting
Hypofractionated radiotherapy followed by Durvalumab with or without Tremelimumab	NCT04430452	II	Patients with liver cancer after progression on prior PD-1 Inhibition	Durvalumab, Hypofractionated Radiation Therapy, Tremelimumab	Not yet recruiting
Regorafenib plus Pembrolizumab	NCT04696055	II	Patients with advanced or metastatic HCC after PD-1/PD-L1	Pembrolizumab, Regorafenib (Stivarga, BAY73-4506)	Recruiting
Recombinant Oncolytic Virus M1 (M1-c6v1) combined with SHR-1210 and Apatinib	NCT04665362	I	Advanced /metastatic HCC patients	Recombinant oncolytic virus M1, anti PD-1 antibody, Apatinib	Not yet recruiting
The comparison of PD-1 inhibitor and concurrent antiviral prophylaxis	NCT04680598	A prospective observational study	Patients with low HBV-DNA loads and high HBV-DNA loads	Drug: PD-1 inhibitor Drug: Antiviral Prophylaxis	Recruiting
The use of HLX10 in combination with HLX04	NCT03973112	II	HCC patients with disease progression or intolerant toxicity after standard treatment	Drug: HLX10+HLX04	Recruiting
Nanoplexed Poly I:C BO-112 (BO-112) and Pembrolizumab	NCT04777708	Early Phase I	Patients with PD-1/PD-L1 refractory liver cancer	Biological: Nanoplexed Poly I:C BO-112 Biological: Pembrolizumab	Not yet recruiting
TACE, Sorafenib and PD-1 monoclonal antibody	NCT04518852	II	Patients with Barcelona clinical liver cancer (BCLC) stage B or stage C (BCLC-B/C) HCC	TACE combined with sorafenib and PD-1 mAb	Recruiting
ATG-008 (a Dual TORC1/2 Inhibitor) combined with toripalimab	NCT04337463	Not Applicable	Patients with advanced solid tumors and HCC	Drug: ATG-008 Drug: Toripalimab	Recruiting
Combination of TATE and PD-1 inhibitor	NCT03259867	II	HCC, colorectal neoplasms, gastric cancer or lung cancer patients.	Drug: Opdivo injectable product or Keytruda injectable product in combination with trans-arterial tirapazamine embolization	Recruiting
Thermal ablation combined with Apatinib and Carilimub	NCT04204577	II	Advanced liver cancer patients	Drug: Apatinib mesylate	Recruiting
Infusion of PD1/PDL1 inhibitor via hepatic arterial versus vein	NCT03949231	III	Advanced HCC patients	Drug: PD1/PDL1 inhibitor	Recruiting
Futibatinib and Pembrolizumab	NCT04828486	II	Advanced or metastatic patients with FGF19 positive BCLC Stage A, B, or C liver cancer.	Futibatinib, Pembrolizumab	Not yet recruiting
Anlotinib hydrochloride combined with Sintilimab injection	NCT04052152	II	Advanced HCC patients	Anlotinib and Sintilimab injection	Recruiting
TSR-022 (anti-TIM-3 antibody) and TSR-042 (anti-PD-1 antibody)	NCT03680508	II	Patients with locally advanced or metastatic liver cancer.	Drug: TSR-022 and TSR-042	Recruiting
Radiotherapy plus Toripalimab versus Sorafenib	NCT04709380	III	Advanced HCC patients	Radiotherapy plus Toripalimab, Sorafenib	Recruiting
Combination of Sintilimab and stereotactic body radiotherapy	NCT04167293	II/III	HCC patients	Radiation: stereotactic body radiotherapy Drug: Sintilimab	Recruiting
SHR-1210 in combination with Apatinib as first-line therapy	NCT03764293	III	Locally advanced or metastatic and unresectable HCC patients	SHR-1210, Apatinib, Sorafenib
Carrillizumab	NCT04487704	Not Applicable	Advanced HCC patients	Camrelizumab	Not yet recruiting
Anti-PD-1 mAb plus metabolic modulator	NCT04114136	II	Patients with renal cell carcinoma, NSCLC, HCC (Child pugh class A only) and so on.	ivolumab or Pembrolizumab (dependent upon approved indication), Metformin, Rosiglitazone	Recruiting
Lenvatinib with Pembrolizumab in combination with TACE	NCT04246177	III	Patients with incurable/non-metastatic HCC.	Lenvatinib, Pembrolizumab,Oral Placebo IV Placebo Procedure: TACE	Recruiting
The length of treatment with PD-1/PD-L1 inhibitors	NCT04157985	III	Patients with cholangiocarcinoma, gastric cancer, HCC and so on.	Continue PD-1/PD-L1 inhibitors treatment or discontinue PD-1/PD-L1-1 inhibitor	Recruiting
Ultrasound ablation and PD-1 antibody blockade	NCT04116320	I	Patients with non- small cell lung cancer, ovarian cancer, HCC and so on.	Device: Echopulse Drug: Imiquimod Drug: standard of care PD-1 therapy	Recruiting
Spartalizumab	NCT04802876	II	Patients with PD1-high mRNA expressing tumors, including HCC	Drug: Spartalizumab	Not yet recruiting
Pembrolizumab versus placebo as adjuvant therapy	NCT03867084	III	Participants with HCC and complete radiological response after surgical resection or local ablation	Biological: Pembrolizumab Drug: Placebo	Recruiting
Coformulated Pembrolizumab/Quavonlimab in combination with Lenvatinib	NCT04740307	II	Advanced HCC patients	Biological: Pembrolizumab/Quavonlimab Drug: Lenvatinib Biological: Pembrolizumab	Recruiting
Combination immunotherapies in patients previously received immune checkpoint inhibitors	NCT03228667	II	Patients with non- small cell lung cancer,colorectal cancerr, HCC and so on.	Immune checkpoint inhibitors	Recruiting
Hepatic arterial infusion combined with Apatinib and Camrelizumab for C-staged HCC in BCLC Classification (TRIPLET)	NCT04191889	II	Patients with C-staged HCC in BCLC classification	Combination Product: hepatic arterial infusion combined with Apatinib and Camrelizumab	Recruiting
Pembrolizumab Plus Yttrium-90 (Y90) radioembolization	NCT03099564	I	HCC patients	Drug: Pembrolizumab Device: Y90 radioembolization	Recruiting
Perioperative Nivolumab with or without Relatlimab	NCT04658147	I	Patients with potentially resectable HCC	Drug: Nivolumab Drug: Relatlimab	Recruiting
OC-001 as monotherapy, and in combination with PD-1 or PD-L1 antibody	NCT04260802	I/II	Patients with neoplasms metastatic cancer, triple negative breast cancer, and HCC and so on.	Drug: OC-001 Drug: OC-001 in combination	Recruiting
DNAJB1-PRKACA fusion kinase peptide vaccine combined with Nivolumab and Ipilimumab	NCT04248569	I	Fibrolamellar HCC patients	Drug: DNAJB1-PRKACA peptide vaccine Drug: Nivolumab Drug: Ipilimumab	Recruiting
